# Supplementary material for: A palladium(ii) triangle as building blocks of microporous molecular materials: structures and catalytic performance
Source: Royal Society of Chemistry journal article supplement (doi:10.1039/b916916d), 2009-11-27
Supplement: b916916d.pdf [file b916916d.pdf]

<Supporting Information>

**A Palladium(II) triangle as Building Blocks of Microporous  
Molecular Materials: Structures and Catalytic Performance**

Yang Liu, Rong Zhang, Cheng He, Dongbin Dang and Chunying Duan

State Key Laboratory of Fine Chemicals, Dalian University of Technology, Dalian 116012,  
China. E-mail: [cyduan@dlut.edu.cn](mailto:cyduan@dlut.edu.cn)

**Contents:**

**Experimental Section.**

Synthesis of 3,3',5,5'-Tetracarboxydiphenylmethane

Calculation of the second grade reaction rate constant

**Figure S1.** <sup>1</sup>H-NMR and <sup>13</sup>C-NMR spectra of the ligand

**Figure S2.** <sup>1</sup>H-NMR spectra of compound **1** immersed in benzene for 4 hours.

**Figure S3.** <sup>1</sup>H-NMR spectra of malononitrile and compound **1** adsorbed malononitrile.

**Figure S4.** <sup>1</sup>H-NMR spectra of salicylaldehyde and compound **1** adsorbed salicylaldehyde

**Figure S5.** ESI-TOF spectra of compound **1** in DMSO solution

**Figure S6.** TGA curve of the desolvent compound **1** immersed in methanol for 4 hours.

**Figure S7.** Gas adsorption isotherms of the crystalline powder of compound **1**

**Figure S8.** IR spectra of compound **1** with malonitrile absorbed.

**Figure S9.** Simulated XRD and XRD of compound **1** data after the reabsorb of methanol

**Figure S10.** XRD pattern of compound **1** after the catalysis reaction with the indexes of some selected diffractions

## Experimental Section

All chemicals were of reagent grade quality obtained from commercial sources and the solvents used were purification by standard procedure. The elemental analyses of C, H and N were performed on a Vario EL III elemental analyzer.  $^1\text{H}$  NMR and  $^{13}\text{C}$  NMR spectra were measured on a Varian INOVA 400M spectrometer.

**Preparation of L:** 3,3',5,5'-Tetracarboxydiphenylmethane tetrachloride<sup>S1</sup> (4.18g, 10mmol) in THF solution was added dropwise to a mixture of 4-Aminomethylpyridine (5.45g, 50mmol) and triethylamine (11.2ml, 80mmol) in dry THF and stirred for 48h at room temperature. Yellow solid was collected by filtration, washed with 10% NaOH aqueous solution, water and dried under vacuum. Yield: 49%.  $^1\text{H}$  NMR (400 MHz, DMSO- $d_6$ , ppm):  $\delta$  = 4.21 (s, 2H), 4.50 (s, 8H), 7.31 (d, 8H), 7.99 (s, 4H), 8.31 (s, 2H), 8.50 (d, 8H), 9.26 (m, 4H).  $^{13}\text{C}$ -NMR (100 MHz, DMSO- $d_6$ ):  $\delta$  = 40.58, 42.30, 122.65, 124.82, 131.14, 135.09, 141.69, 148.86, 149.98, 166.53. Anal. Calcd. for  $\text{C}_{41}\text{H}_{36}\text{N}_8\text{O}_4 \cdot 4\text{H}_2\text{O}$ : C, 63.39; H, 5.71; N, 14.42 %. Found: C, 63.25; H, 5.73; N, 14.38 %.

### Calculation of the second grade reaction rate constant

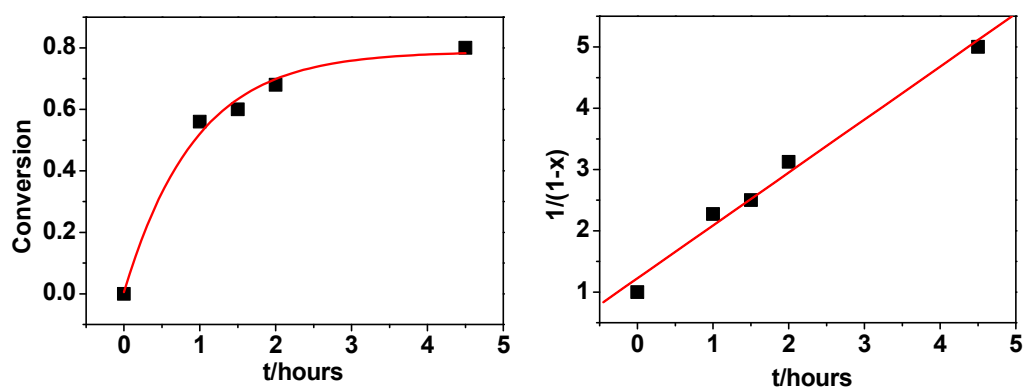

Conversion (%) vs time (left) and linear fit according to the second grade reaction, x is the conversion (right).

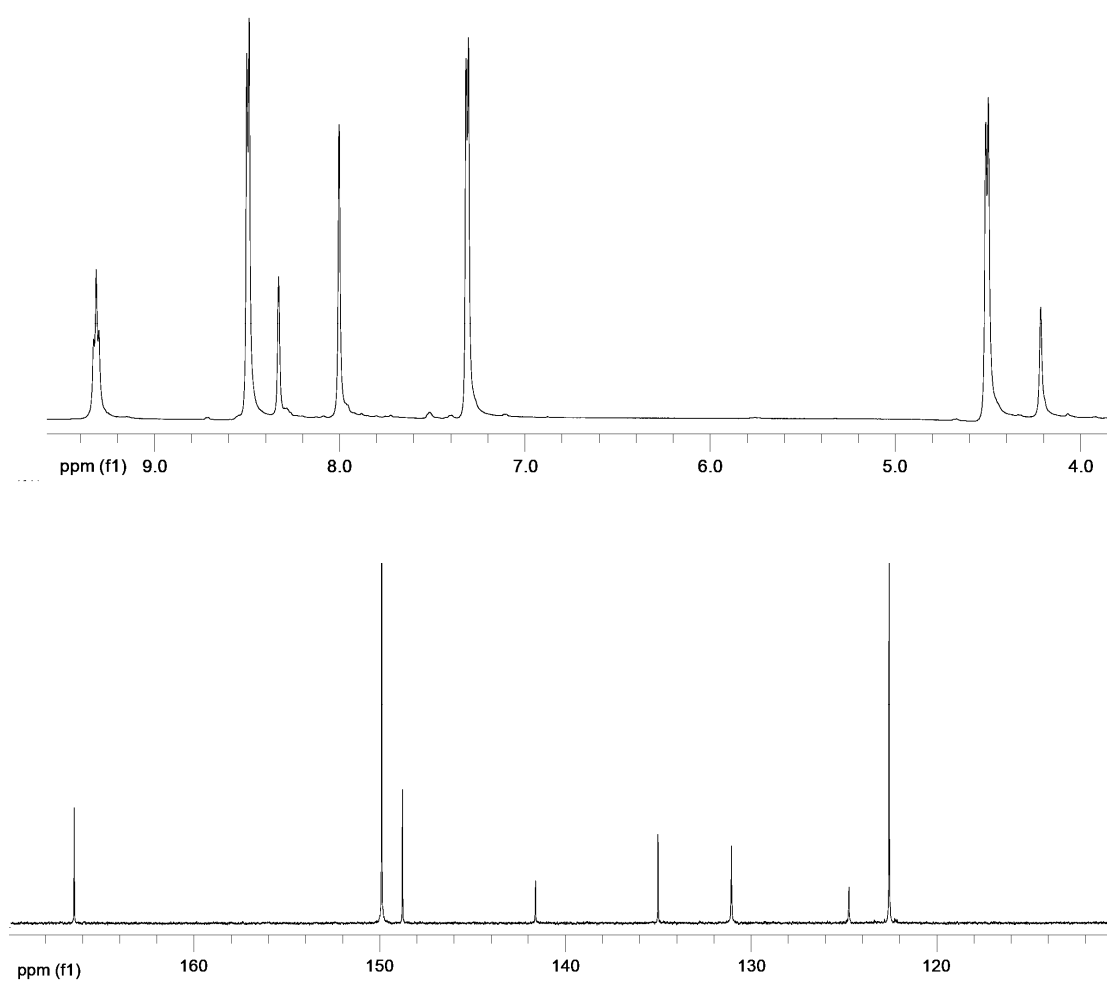

**Figure S1.**  $^1\text{H}$ -NMR (top picture) and  $^{13}\text{C}$ -NMR (bottom one ) spectra of the ligand in  $d_6$ -DMSO

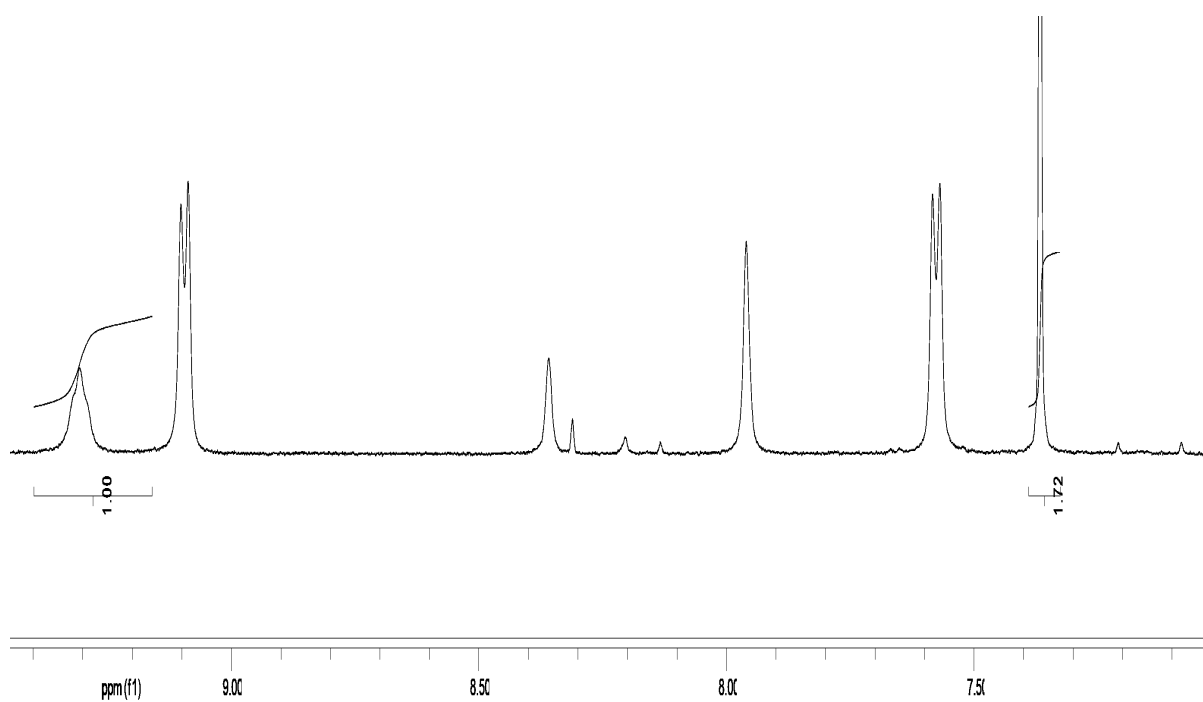

**Figure S2.**  $^1\text{H}$ -NMR ( $\text{d}_6$ -DMSO) spectra of compound **1** immersed in benzene for 24 hours.

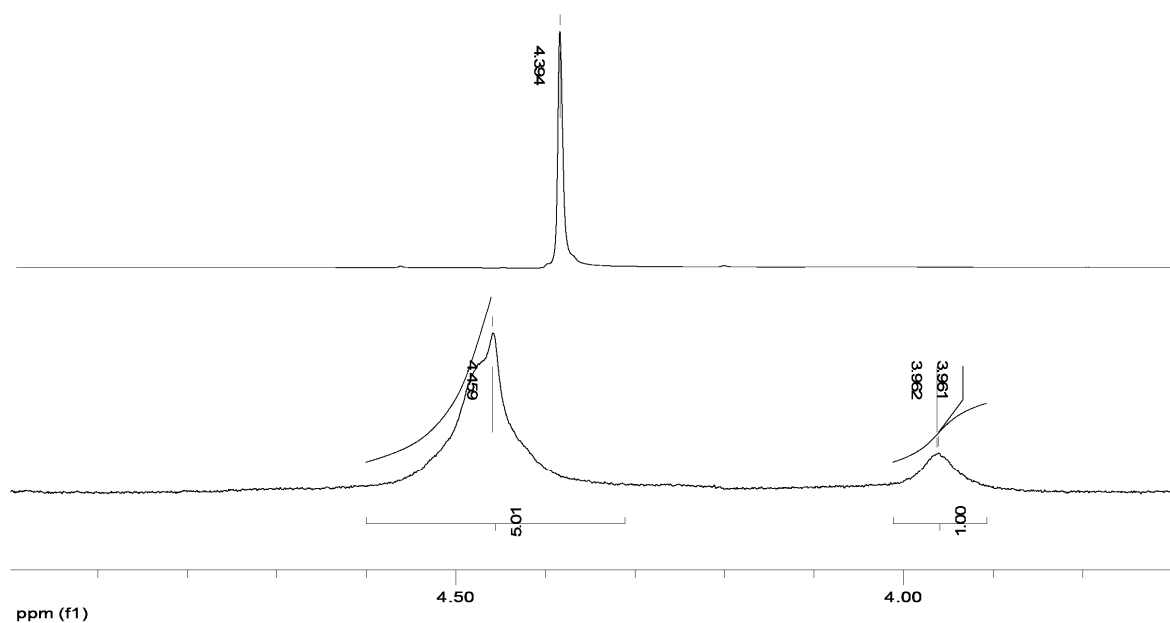

**Figure S3.**  $^1\text{H}$ -NMR spectra ( $\text{d}_6$ -DMSO) of malononitrile (top) and compound **1** adsorbed malononitrile (bottom).

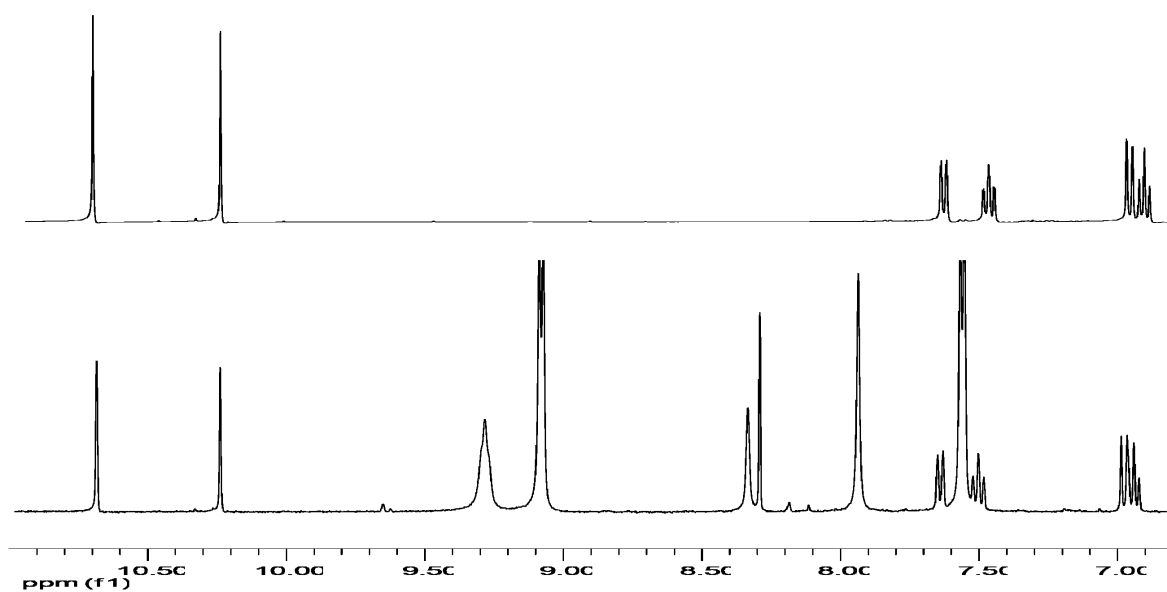

**Figure S4.**  $^1\text{H}$ -NMR spectra ( $\text{d}_6$ -DMSO) of salicylaldehyde (top picture) and compound **1** triangle adsorbed salicylaldehyde (bottom)

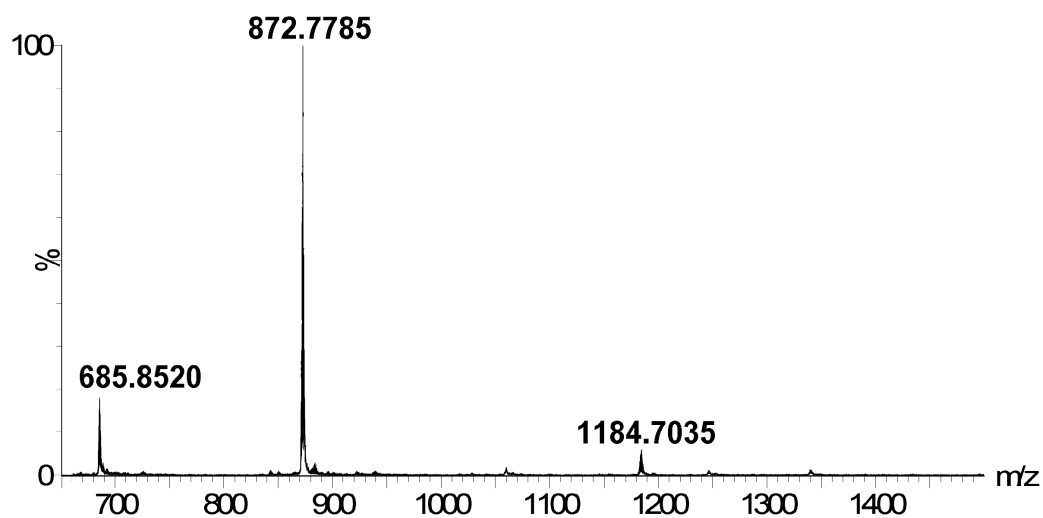

**Figure S5** ESI-TOF spectra of the Pd(II)-based triangles formed in DMSO solution

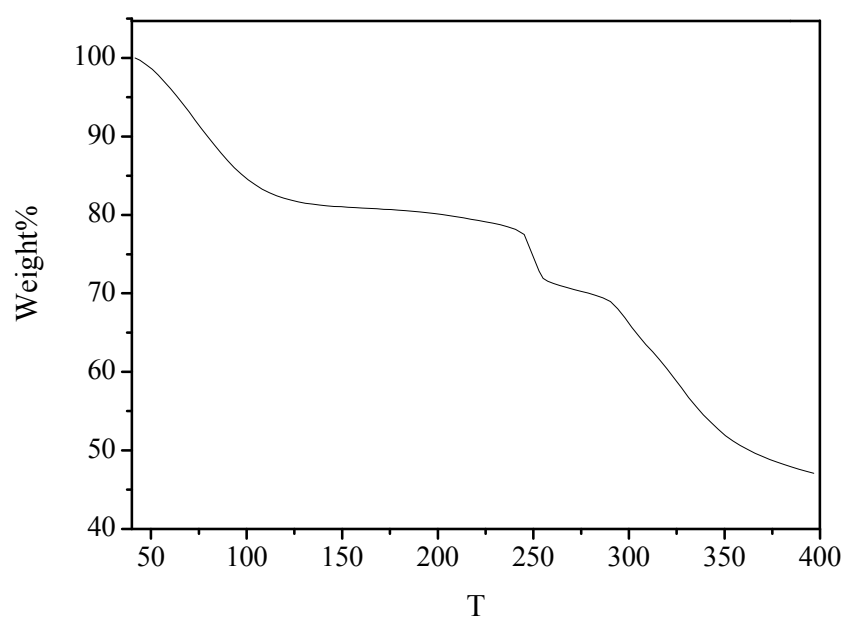

**Figure S6.** TGA curve of deslovent compound **1** immersed in methanol for 4 hours (bottom one).

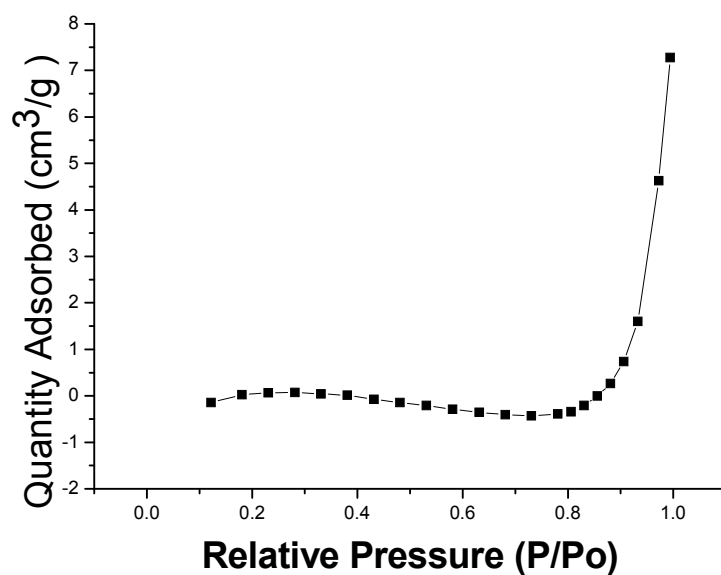

**Figure S7.** Gas adsorption isotherms for the uptake of N<sub>2</sub> (77 K) of the crystalline powder of the as-synthesized compound **1**

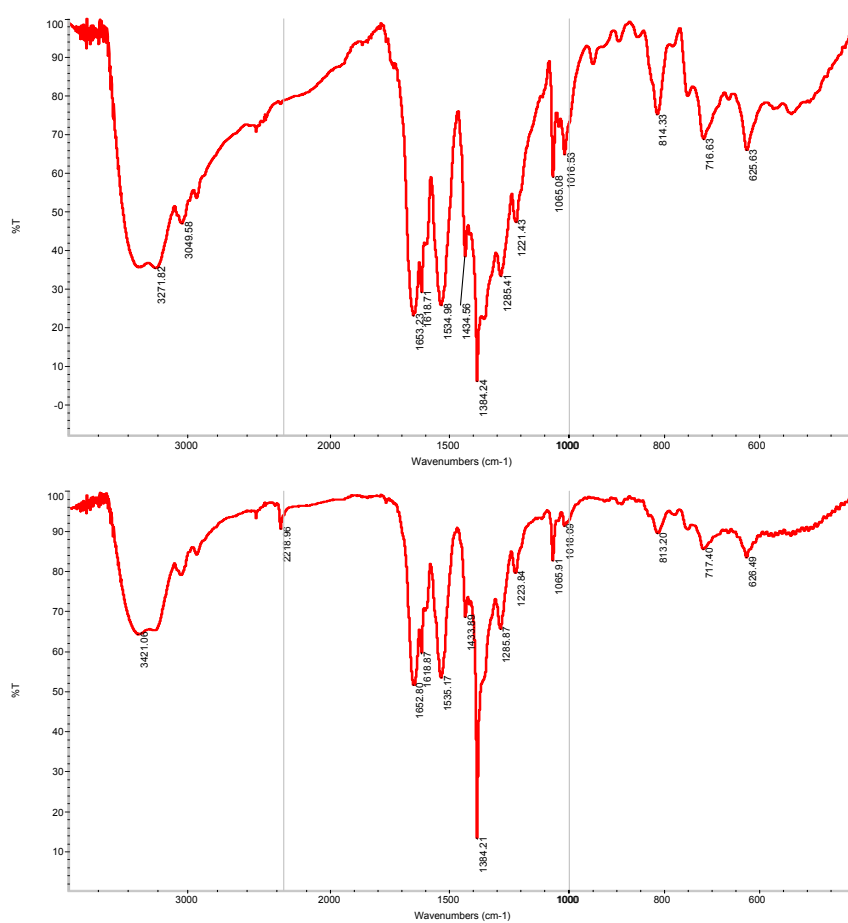

**Figure S8.** IR spectra of compound **1** and of compound **1** after immersing in benzene containing malononitrile (bottom)

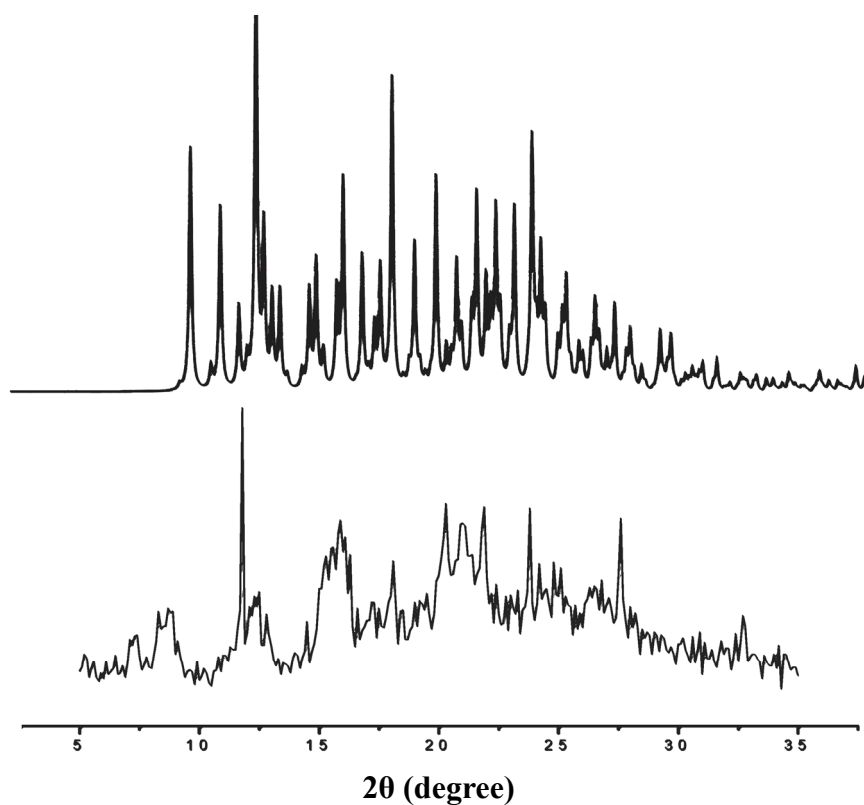

**Figure S9.** XRD pattern of compound **1** data after the reabsorb of methanol (bottom) and simulation of the XRD according to single crystal diffraction of compound **1** (top).

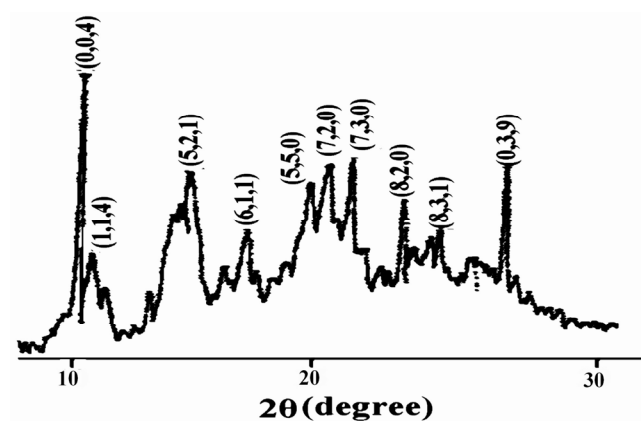

**Figure S10.** XRD pattern of compound **1** after the catalysis reaction with the indexes of some selected diffractions (the crystallographic index of the polycrystals was based on the least-square fitting of the cell parameters and the  $2\theta$  of these diffractions).

**Reference:**

S1. M. Mazik and A. König, *Eur. J. Org. Chem.* 2007, 3271–3276
